# Supplementary material
Source: Springer Nature journal article supplement (https://www.springermedizin.de/resource/supplementary/12943_2012_1034_MOESM5_ESM.pdf/9552170)

**A**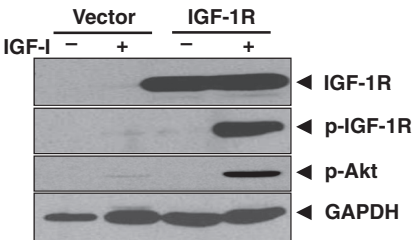**C**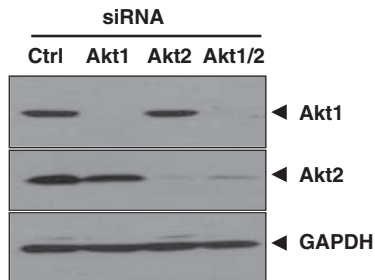**B****IGF-1R\_Akts**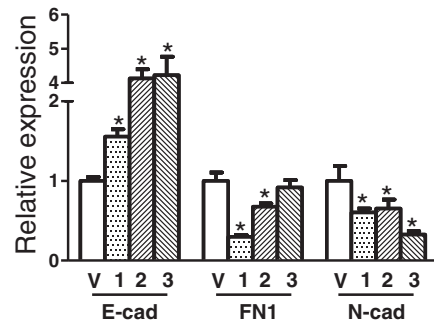**D****IGF-1R\_siAkts**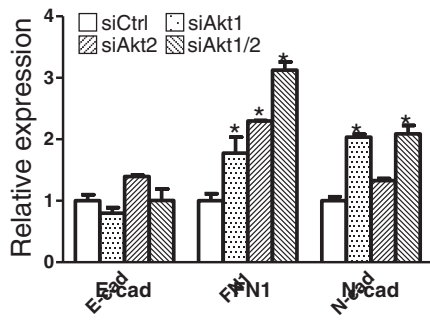

Supplement: MOESM5 [file 9552170]
